# Supplementary material for: Coronary Artery Calcification (CAC) and Post‐Trial Cardiovascular Events and Mortality Within the Women's Health Initiative (WHI) Estrogen‐Alone Trial
Source: PubMed Central journal article supplement — J Am Heart Assoc. 2017 Oct 27;6(11):e006887. doi: 10.1161/JAHA.117.006887 (PMC5721773; doi:10.1161/jaha.117.006887), 2017-10-27
Supplement: JAH3-6-e006887-s001.pdf [file JAH3-6-e006887-s001.pdf]

# **SUPPLEMENTAL MATERIAL**

**Table S1. Participant Characteristics, Overall,\* and for CEE-Alone vs. Placebo**

|                                          | <b>Total<br/>(n=1020)</b> |          | <b>Placebo<br/>(n=503)</b> |          | <b>CEE-Alone<br/>(n=517)</b> |          | <b>p-value</b> |      |
|------------------------------------------|---------------------------|----------|----------------------------|----------|------------------------------|----------|----------------|------|
|                                          | Mean                      | SD       | Mean                       | SD       | Mean                         | SD       |                |      |
|                                          | <b>Age, years</b>         | 55.13    | 2.87                       | 55.14    | 2.94                         | 55.11    |                | 2.80 |
| <b>Age at scan</b>                       | 64.38                     | 2.89     | 64.38                      | 2.92     | 64.39                        | 2.85     | 0.94           |      |
| <b>Body Mass Index, kg/m<sup>2</sup></b> | 30.56                     | 6.04     | 30.58                      | 6.28     | 30.54                        | 5.79     | 0.91           |      |
| <b>Waist Circumference, cm</b>           | 91.65                     | 14.33    | 91.52                      | 14.33    | 91.77                        | 14.34    | 0.79           |      |
| <b>SBP, mmHg</b>                         | 124.54                    | 15.70    | 125.20                     | 16.60    | 123.90                       | 14.77    | 0.18           |      |
| <b>DBP, mmHg</b>                         | 77.79                     | 8.86     | 78.06                      | 8.81     | 77.53                        | 8.91     | 0.34           |      |
| <b>log METs</b>                          | 1.76                      | 1.21     | 1.79                       | 1.23     | 1.73                         | 1.19     | 0.45           |      |
| <b>CAC score</b>                         | 98.22                     | 294.98   | 120.92                     | 349.90   | 76.12                        | 227.44   | 0.01           |      |
| <b>Categorical</b>                       | <b>n</b>                  | <b>%</b> | <b>n</b>                   | <b>%</b> | <b>n</b>                     | <b>%</b> | <b>p-value</b> |      |
| <b>Diabetes</b>                          | no                        | 957      | 93.92                      | 470      | 93.63                        | 487      | 94.20          | 0.70 |
|                                          | yes                       | 62       | 6.08                       | 32       | 6.37                         | 30       | 5.80           |      |
| <b>Smoking</b>                           | never                     | 496      | 48.92                      | 248      | 49.60                        | 248      | 48.25          | 0.76 |
|                                          | past                      | 401      | 39.55                      | 198      | 39.60                        | 203      | 39.49          |      |
|                                          | current                   | 117      | 11.54                      | 54       | 10.80                        | 63       | 12.26          |      |
| <b>Hypertension</b>                      | no                        | 698      | 68.63                      | 348      | 69.32                        | 350      | 67.96          | 0.64 |
|                                          | yes                       | 319      | 31.37                      | 154      | 30.68                        | 165      | 32.04          |      |
| <b>High cholesterol</b>                  | no                        | 786      | 90.45                      | 386      | 90.61                        | 400      | 90.29          | 0.87 |
|                                          | yes                       | 83       | 9.55                       | 40       | 9.39                         | 43       | 9.71           |      |
| <b>MI in 1st degree<br/>relative</b>     | no                        | 505      | 52.06                      | 251      | 51.75                        | 254      | 52.37          | 0.85 |
|                                          | yes                       | 465      | 47.94                      | 234      | 48.25                        | 231      | 47.63          |      |
| <b>CVD prior to scan</b>                 | no                        | 931      | 91.27                      | 454      | 90.26                        | 477      | 92.26          | 0.26 |
|                                          | yes                       | 89       | 8.73                       | 49       | 9.74                         | 40       | 7.74           |      |
| <b>CAC score</b>                         | 0                         | 550      | 53.92                      | 256      | 50.89                        | 294      | 56.87          | 0.05 |
|                                          | 1-100                     | 273      | 26.76                      | 135      | 26.84                        | 138      | 26.69          |      |
|                                          | >100                      | 197      | 19.31                      | 112      | 22.27                        | 85       | 16.44          |      |

**Table S1. Cont'd**

CAC indicates coronary artery calcium; CEE, conjugated equine estrogen; CVD, cardiovascular disease; DBP, diastolic blood pressure; METs, metabolic equivalents; MI, myocardial infarction; and SBP, systolic blood pressure

\* excludes n=10 with surgical stent and n=44 without follow up data

p values from t-test, Wilcoxon rank sum test or chi square tests compare CEE-Alone vs. placebo.

| <b>Table S2. Multivariable-adjusted HR(95%CI) for CHD by CAC Categories</b>                                                                                                                                                                                                                                                |                   |                           |
|----------------------------------------------------------------------------------------------------------------------------------------------------------------------------------------------------------------------------------------------------------------------------------------------------------------------------|-------------------|---------------------------|
|                                                                                                                                                                                                                                                                                                                            |                   | <b>CHD*<br/>HR(95%CI)</b> |
| <b>Model 1†</b>                                                                                                                                                                                                                                                                                                            | CAC = 0           | 1.0 (ref)                 |
|                                                                                                                                                                                                                                                                                                                            | CAC 1-100 (ref=0) | 2.13 (0.53, 8.54)         |
|                                                                                                                                                                                                                                                                                                                            | CAC > 100 (ref=0) | <b>7.94 (2.40, 26.34)</b> |
|                                                                                                                                                                                                                                                                                                                            | Age               | 1.07 (0.89, 1.28)         |
| <b>Model 2†</b>                                                                                                                                                                                                                                                                                                            | CAC = 0           | 1.0 (ref)                 |
|                                                                                                                                                                                                                                                                                                                            | CAC 1-100 (ref=0) | 2.67 (0.59, 12.11)        |
|                                                                                                                                                                                                                                                                                                                            | CAC > 100 (ref=0) | <b>7.88 (1.94, 31.98)</b> |
|                                                                                                                                                                                                                                                                                                                            | Age               | 1.15 (0.92, 1.44)         |
|                                                                                                                                                                                                                                                                                                                            | Diabetes          | 1.17 (0.14, 9.54)         |
|                                                                                                                                                                                                                                                                                                                            | Smoking           | 0.71 (0.21, 2.38)         |
|                                                                                                                                                                                                                                                                                                                            | Hypertension      | 1.32 (0.29, 5.98)         |
|                                                                                                                                                                                                                                                                                                                            | High cholesterol  | 2.42 (0.74, 7.86)         |
| <b>Model 3†</b>                                                                                                                                                                                                                                                                                                            | CAC = 0           | 1.0 (ref)                 |
|                                                                                                                                                                                                                                                                                                                            | CAC 1-100 (ref=0) | 2.64 (0.57, 12.22)        |
|                                                                                                                                                                                                                                                                                                                            | CAC > 100 (ref=0) | <b>8.69 (2.11, 35.86)</b> |
|                                                                                                                                                                                                                                                                                                                            | Age               | 1.15 (0.92, 1.43)         |
|                                                                                                                                                                                                                                                                                                                            | Diabetes          | 1.04 (0.12, 9.23)         |
|                                                                                                                                                                                                                                                                                                                            | Smoking           | 2.40 (0.72, 8.05)         |
|                                                                                                                                                                                                                                                                                                                            | Hypertension      | 0.77 (0.21, 2.78)         |
|                                                                                                                                                                                                                                                                                                                            | High cholesterol  | 1.44 (0.32, 6.70)         |
|                                                                                                                                                                                                                                                                                                                            | Hot flashes       | 0.88 (0.23, 3.36)         |
|                                                                                                                                                                                                                                                                                                                            | BMI 25-29.9       | 0.40 (0.09, 1.80)         |
|                                                                                                                                                                                                                                                                                                                            | BMI 30-34.9       | 1.06 (0.28, 4.08)         |
|                                                                                                                                                                                                                                                                                                                            | BMI ≥35           | 0.19 (0.02, 1.79)         |
| <p>BMI indicates body mass index; CAC, coronary artery calcium; and CHD, coronary heart disease. *Excludes women with CVD at baseline or prior to CAC scan, or no follow-up n=931. † Covariates include CEE-alone vs. placebo and the variables reported for each model. Statistically significant results are bolded.</p> |                   |                           |

**Table S3. Multivariable-adjusted HR(95%CI) for CVD\* with Recategorized Current Smoking and Systolic Blood Pressure**

|                       |                                                            | <b>HR (95% CI)</b>       |
|-----------------------|------------------------------------------------------------|--------------------------|
| <b>Model 1†</b>       | CAC 1-100 (ref=0)                                          | <b>1.91 (1.05, 3.47)</b> |
|                       | CAC >100 (ref=0)                                           | <b>4.41 (2.49, 7.82)</b> |
|                       | Age , years                                                | 1.01 (0.93, 1.10)        |
| <b>Model 2†</b>       | CAC 1-100 (ref=0)                                          | 1.58 (0.79, 3.14)        |
|                       | CAC >100 (ref=0)                                           | <b>4.05 (2.12, 7.75)</b> |
|                       | Age , years                                                | 1.02 (0.93, 1.13)        |
|                       | Diabetes (ref=no)                                          | 1.84 (0.78, 4.36)        |
|                       | Current smoker: # cigarettes 1-14 (ref=no current smoking) | 0.48 (0.12, 2.01)        |
|                       | Current smoker: # cigarettes 15+ (ref=no current smoking)  | 2.27 (0.94, 5.49)        |
|                       | SBP 118-130 mmHg (ref =SBP<118)                            | 1.25 (0.63, 2.46)        |
|                       | SBP >130 mmHg (ref =SBP<118)                               | 1.44 (0.74, 2.81)        |
|                       | High cholesterol (ref=no)                                  | 1.76 (0.86, 3.64)        |
| <b>Model 3†</b>       | CAC 1-100 (ref=0)                                          | 1.51 (0.75, 3.01)        |
|                       | CAC >100 (ref=0)                                           | <b>3.96 (2.07, 7.57)</b> |
|                       | Age , years                                                | 1.03 (0.93, 1.13)        |
|                       | Diabetes (ref=no)                                          | 1.67 (0.70, 4.00)        |
|                       | Current smoker: # cigarettes 1-14 (ref=no current smoking) | 0.50 (0.12, 2.06)        |
|                       | Current smoker: # cigarettes 15+ (ref=no current smoking)  | 2.32 (0.94, 5.68)        |
|                       | SBP 118-130 mmHg (ref =SBP<118)                            | 1.19 (0.60, 2.35)        |
|                       | SBP >130 mmHg (ref =SBP<118)                               | 1.35 (0.69, 2.63)        |
|                       | High cholesterol (ref=no)                                  | 1.78 (0.87, 3.68)        |
|                       | BMI 25-29.9 (ref= BMI<25)                                  | 1.38 (0.54, 3.54)        |
|                       | BMI 30-34.9 (ref= BMI<25)                                  | 1.94 (0.76, 4.93)        |
| BMI ≥35 (ref= BMI<25) | 1.50 (0.56, 4.05)                                          |                          |

BMI indicates body mass index; CAC, coronary artery calcium; CEE, conjugated equine estrogen; CVD, cardiovascular disease; and PY, person-years

\*Excludes women with CVD at baseline or prior to CAC scan, or no follow-up n=931.

† Each model is adjusted for CEE vs. placebo (not shown) as well as the predictors reported for that model. Statistically significant results are bolded.

**Table S4. All Incident CVD Outcomes from WHI Baseline by CAC Categories for E-Along, Placebo and Total (combined), n=1074\***

| Event         | CAC   | E-Along Control |             |       |                           | E-Along Intervention |             |       |                           | All (E-Along + Placebo) |             |       |                           |
|---------------|-------|-----------------|-------------|-------|---------------------------|----------------------|-------------|-------|---------------------------|-------------------------|-------------|-------|---------------------------|
|               |       | Total<br>n      | Events<br>n | %     | Age-adjusted rate/1000 PY | Total<br>n           | Events<br>n | %     | Age-adjusted rate/1000 PY | Total<br>n              | Events<br>n | %     | Age-adjusted rate/1000 PY |
| <b>MI</b>     | all   | 529             | 19          | 3.59  | 2.09 (0.99,4.61)          | 545                  | 17          | 3.12  | 1.80 (0.79,4.16)          | 1074                    | 36          | 3.35  | 1.93 (1.10,3.43)          |
|               | 0     | 267             | 4           | 1.50  | 0.69 (0.10,4.91)          | 301                  | 4           | 1.33  | 0.75 (0.20,3.19)          | 568                     | 8           | 1.41  | 0.69 (0.21,2.65)          |
|               | 1-100 | 142             | 5           | 3.52  | 2.01 (0.60,6.86)          | 152                  | 3           | 1.97  | 0.79 (0.11,5.58)          | 294                     | 8           | 2.72  | 1.40 (0.50,3.96)          |
|               | >100  | 120             | 10          | 8.33  | 4.94 (1.79,16.51)         | 92                   | 10          | 10.87 | 7.13 (2.47,21.30)         | 212                     | 20          | 9.43  | 5.94 (2.81,13.15)         |
| <b>Stroke</b> | all   | 529             | 15          | 2.84  | 1.74 (0.75,4.16)          | 545                  | 14          | 2.57  | 1.52 (0.63,3.79)          | 1074                    | 29          | 2.70  | 1.64 (0.88,3.07)          |
|               | 0     | 267             | 5           | 1.87  | 1.22 (0.32,5.52)          | 301                  | 8           | 2.66  | 1.57 (0.53,5.30)          | 568                     | 13          | 2.29  | 1.43 (0.59,3.60)          |
|               | 1-100 | 142             | 4           | 2.82  | 1.77 (0.44,7.06)          | 152                  | 2           | 1.32  | 0.79 (0.11,5.61)          | 294                     | 6           | 2.04  | 1.21 (0.32,5.09)          |
|               | >100  | 120             | 6           | 5.00  | 2.61 (0.91,9.28)          | 92                   | 4           | 4.35  | 3.05 (0.63,16.06)         | 212                     | 10          | 4.72  | 2.85 (0.99,8.94)          |
| <b>CVD</b>    | all   | 529             | 70          | 13.23 | 8.04 (5.36,12.14)         | 545                  | 70          | 12.84 | 7.41 (4.87,11.30)         | 1074                    | 140         | 13.04 | 7.73 (5.77,10.37)         |
|               | 0     | 267             | 18          | 6.74  | 4.21 (1.91,9.42)          | 301                  | 20          | 6.64  | 3.77 (1.73,8.21)          | 568                     | 38          | 6.69  | 3.94 (2.25,6.90)          |
|               | 1-100 | 142             | 16          | 11.27 | 7.01 (3.03,16.61)         | 152                  | 21          | 13.82 | 7.56 (3.48,16.97)         | 294                     | 37          | 12.59 | 7.25 (4.08,13.05)         |
|               | >100  | 120             | 36          | 30.00 | 19.21 (10.49,35.92)       | 92                   | 29          | 31.52 | 22.08 (11.57,42.30)       | 212                     | 65          | 30.66 | 20.63 (13.24,32.31)       |

BMI indicates body mass index; CAC, coronary artery calcium; CEE, conjugated equine estrogen; CHD, coronary heart disease; CVD, cardiovascular disease; HF, heart failure; HT, hormone therapy; TIA, transient ischemic attack; PAD, peripheral artery disease; and PY, person-years

\* no exclusions; follow up time: from study entry to event or end of follow up.
